# Supplementary material for: Modeling the effects of active wake mixing on wake behavior through large-scale coherent structures
Source: Copernicus journal article supplement (doi:10.5194/wes-10-1403-2025), 2025-07-18
Supplement: Supplementary file 1 [file wes-10-1403-2025-supplement.zip]

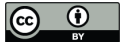

## *Supplement of*

# **Modeling the effects of active wake mixing on wake behavior through large-scale coherent structures**

**Lawrence Cheung et al.**

*Correspondence to:* Lawrence Cheung (lcheung@sandia.gov)

- wes-10-1403-2025-supplement-title-page.pdf
- case-files
  - README.md
  - input\_files
    - \* HighWS
    - \* LowWS
    - \* MedWS
  - notebooks
    - \* HighWS\_LowTI.Flight
    - \* LowWS\_LowTI.Frontier
    - \* MedWS\_LowTI.Frontier
  - precursors
    - \* precursor\_HighWS.inp
    - \* precursor\_LowWs.inp
    - \* precursor\_MedWS.inp
  - turbine\_model
    - \* IEA15MW.yaml
    - \* OpenFAST3p5\_IEA15MW

The copyright of individual parts of the supplement might differ from the article licence.
